# Supplementary material for: Reducing sample rejection in Durban, South Africa
Source: publisher site journal article supplement (doi:10.1515/cclm-2020-0827), 2020-10-20
Supplement: Supplementary file 1 [file j_cclm-2020-0827_suppl.docx]

**Supplementary Table 1**: List of reasons for rejecting specimen used at IALCH Chemical Pathology department (grouped into major categories)

| **Cancelled** | **Contaminated** | **Not done: Unsuitable** | **Lab Error** | **Invalid HIL (SIND)** | **Wrong tube** | **Unsuitable: Too Old** | **Other** | | **Insufficient Specimen** | **Poor Quality Specimen** | **Specimen not received** |
| --- | --- | --- | --- | --- | --- | --- | --- | --- | --- | --- | --- |
| Cancelled by doctor | Contaminated | Unsuitable: leaked | Lab error | Unsuitable: icteric | Require specific  temperature  specimen | Unsuitable: 1-day old | Not done: sample  type not indicated | Not done: EDTA  spun for plasma test | Insufficient  specimen | Not done: poor  quality specimen | Specimen not  received |
| Cancel: not  indicated (results) | Invalid: EDTA  contamination | Unsuitable: not  frozen | Withdrawn: lab error | Unsuitable:  haemolysed | Require protected  vs light specimen | Unsuitable: 3 days old | Not clinically  indicated | Invalid result. Repeat |  |  |  |
| Cancel: not  Indicated | Unsuitable:  contaminated | Not done: unsuitable | Not done: lab error | Invalid: haemolysis | Required fluoride  specimen | Unsuitable 2 days old | Not done: lost in transit | Not done: discarded |  |  |  |
| Cancelled by doctor |  | Unsuitable: clotted |  | Unsuitable: lipemic | Require EDTA | Unsuitable: > 3 days old | Specimen not  labelled | Require on ice |  |  |  |
| Cancelled-  Gatekeeping |  | Unsuitable: bloodstained |  | Icteric | Require separate  specimen | Unsuitable: too old | Test inactive on Trakcare | Duplicate  registration |  |  |  |
| Cancel: replaced by another test |  | Unsuitable: incorrect/ no  preservative |  | Lipemia | Require urine  specimen |  | Specimen not  received on ice | Performance not  established |  |  |  |
| Cancelled by lab (duplicate request) |  | Unsuitable: EDTA  clotted |  |  | Require fluid  specimen |  | Not done: not  offered in this lab | Failed after repeat attempts |  |  |  |
| Cancel phoning |  | Unsuitable: too  viscous |  |  | Require 24 hour  urine specimen |  | No test set  requested | Not done: test  discontinued |  |  |  |
| Cancelled by lab (incorrect test) |  | Unsuitable: fibrin  clots |  |  | Require clotted  specimen |  | Information doesn’t  match | Test not done  (based on other  results) |  |  |  |
| Cancel: Consultation  required |  | Unsuitable: expired  tube |  |  | Require sealed  syringe specimen |  | Not done: technical  problems | Withdrawn: patient Identity in doubt |  |  |  |
|  |  |  |  |  | Require blood  specimen |  | Unable to calculate:  absent value | Unable to calculate: out of range result |  |  |  |
|  |  |  |  |  | Require citrate (blue top)  specimen |  | Specimen not protected from light | Not done: technical  problem |  |  |  |
|  |  |  |  |  | Require cerebrospinal fluid  specimen |  | Invalid: no serum  separation | Specimen container  empty |  |  |  |
|  |  |  |  |  | Requires stool  specimen |  | Specimen container broken | Bloodstained |  |  |  |
